# Supplementary material
Source: Springer Nature journal article supplement (https://www.springermedizin.de/resource/supplementary/12958_2004_199_MOESM9_ESM.pdf/9567356)

**a.**

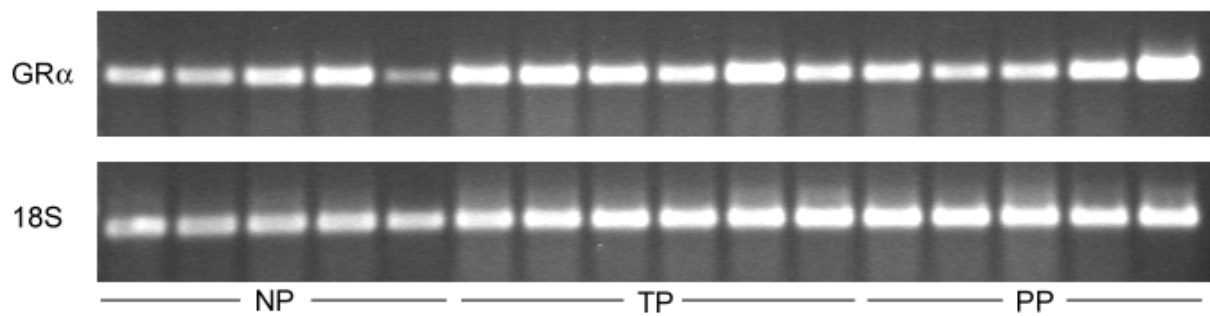

**b.**

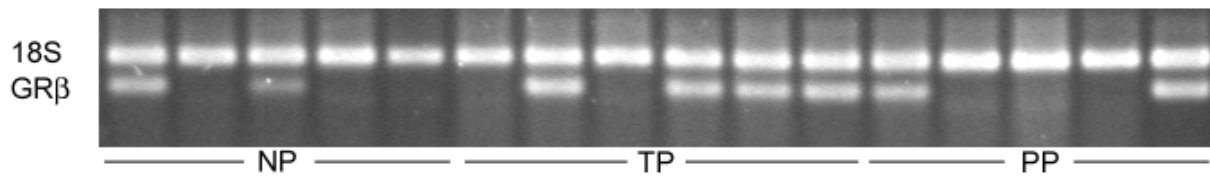

**c.**

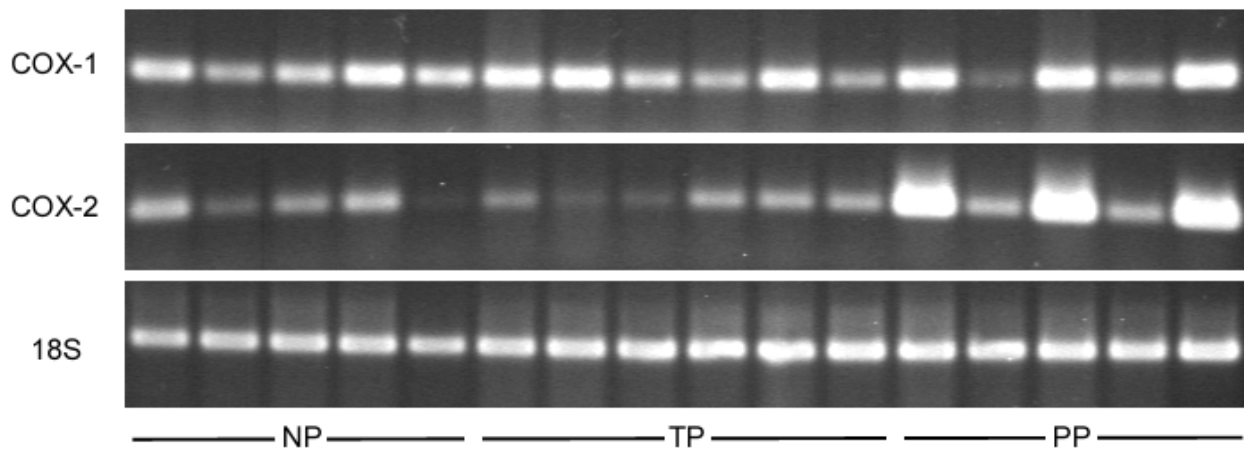

Supplement: MOESM9 [file 9567356]
